# Supplementary material for: Implications of coverage-dependent O adsorption for catalytic NO oxidation on the late transition metals
Source: Royal Society of Chemistry journal article supplement (doi:10.1039/c4cy00763h), 2014-01-01
Supplement: c4cy00763h1.pdf [file c4cy00763h1.pdf]

# Implications of Coverage-Dependent O Adsorption for Catalytic NO Oxidation on the Late Transition Metals

## Supplemental Information

Kurt Frey<sup>1</sup>, David J Schmidt<sup>2</sup>, Chris Wolverton<sup>3</sup>, William F Schneider<sup>\*</sup>

- 1 - kurtfrey@gmail.com; Department of Chemical and Biomolecular Engineering; 182 Fitzpatrick Hall, University of Notre Dame, Notre Dame, IN 46556
- 2 - daspiffy@gmail.com; Department of Chemical and Biomolecular Engineering; 182 Fitzpatrick Hall, University of Notre Dame, Notre Dame, IN 46556
- 3 - c-wolverton@northwestern.edu; Department of Materials Science and Engineering, Northwestern University, 2220 Campus Drive, Cook Hall Room 2036, Evanston, IL 60208
- \* - Corresponding Author; wschneider@nd.edu; Department of Chemistry and Biochemistry, 251 Nieuwland Science Hall, Notre Dame, IN 46556;  
Department of Chemical and Biomolecular Engineering; 182 Fitzpatrick Hall, University of Notre Dame, Notre Dame, IN 46556

A unique identifier for each formation energy calculation, fractional coverage, supercell vectors, adsorbate arrangement, and k-point mesh size are given in table A.1.

**Table A.1. Summary of supercell arrangements and adsorbate configurations used in formation energy calculations.**

| ID# | Coverage<br>$N_{\text{ads}}/N_{\text{site}}$ | Supercell<br>Vectors | Adsorbate<br>Vectors | k-Point | $E_{\text{frm}}$ (eV/site) |        |        |        |        |        |       |       |        |       |       |
|-----|----------------------------------------------|----------------------|----------------------|---------|----------------------------|--------|--------|--------|--------|--------|-------|-------|--------|-------|-------|
|     |                                              |                      |                      |         | Ru                         | Os     | Co     | Rh     | Ir     | Ni     | Pd    | Pt    | Cu     | Ag    | Au    |
| 110 | 0/1                                          | a,b,c                |                      | 12,12,1 | 1.001                      | 1.178  | 0.750  | 0.806  | 0.914  | 0.651  | 0.567 | 0.631 | 0.464  | 0.351 | 0.343 |
| 111 | 1/1                                          | a,b,c                |                      | 12,12,1 | -1.199                     | -0.949 | -1.068 | -0.513 | -0.140 | -0.322 | 0.305 | 0.393 | 0.589  | 1.308 | 1.364 |
| 112 | 0/2                                          | a,a+2b,c             |                      | 10,6,1  | 1.015                      | 1.178  | 0.743  | 0.809  | 0.915  | 0.647  | 0.558 | 0.632 | 0.462  | 0.349 | 0.341 |
| 113 | 1/2                                          | a,a+2b,c             |                      | 10,6,1  | -0.340                     | -0.147 | -0.558 | -0.135 | 0.075  | -0.409 | 0.026 | 0.134 | -0.062 | 0.354 | 0.455 |
| 114 | 2/2                                          | a,a+2b,c             |                      | 10,6,1  | -1.199                     | -0.960 | -1.071 | -0.514 | -0.144 | -0.324 | 0.299 | 0.392 | 0.597  | 1.316 | 1.363 |
| 115 | 0/3                                          | 3a+2b,-3a-b,c        |                      | 10,10,1 | 1.011                      | 1.173  | 0.743  | 0.793  | 0.904  | 0.656  | 0.553 | 0.640 | 0.464  | 0.350 | 0.344 |
| 116 | 1/3                                          | 3a+2b,-3a-b,c        |                      | 10,10,1 | 0.102                      | 0.272  | -0.132 | 0.154  | 0.341  | -0.063 | 0.183 | 0.302 | 0.099  | 0.346 | 0.358 |
| 117 | 2/3                                          | 3a+2b,-3a-b,c        |                      | 10,10,1 | -0.651                     | -0.474 | -0.840 | -0.317 | -0.070 | -0.517 | 0.059 | 0.170 | .      | 0.613 | 0.667 |
| 118 | 3/3                                          | 3a+2b,-3a-b,c        |                      | 10,10,1 | -1.196                     | -0.964 | -1.070 | -0.528 | -0.149 | -0.303 | 0.298 | 0.397 | 0.604  | 1.330 | 1.370 |
| 119 | 0/3                                          | a-b,a+2b,c           |                      | 7,7,1   | 1.014                      | 1.158  | 0.745  | 0.804  | 0.920  | 0.658  | 0.573 | 0.653 | 0.461  | 0.346 | 0.337 |
| 120 | 1/3                                          | a-b,a+2b,c           |                      | 7,7,1   | 0.109                      | 0.288  | -0.226 | 0.132  | 0.318  | -0.190 | 0.143 | 0.262 | -0.069 | 0.213 | 0.344 |
| 121 | 2/3                                          | a-b,a+2b,c           |                      | 7,7,1   | -0.653                     | -0.502 | -0.779 | -0.258 | -0.081 | -0.526 | 0.023 | 0.102 | 0.040  | 0.579 | 0.613 |
| 122 | 3/3                                          | a-b,a+2b,c           |                      | 7,7,1   | -1.187                     | -0.974 | -1.072 | -0.510 | -0.135 | -0.318 | 0.308 | 0.395 | 0.600  | 1.324 | 1.358 |
| 124 | 0/4                                          | 2a,a+2b,c            |                      | 5,6,1   | 1.014                      | 1.195  | 0.742  | 0.804  | 0.913  | 0.651  | 0.565 | 0.638 | 0.463  | 0.350 | 0.340 |
| 125 | 1/4                                          | 2a,a+2b,c            |                      | 5,6,1   | 0.281                      | 0.467  | -0.006 | 0.279  | 0.444  | -0.002 | 0.225 | 0.323 | 0.038  | 0.220 | 0.314 |
| 126 | 2/4                                          | 2a,a+2b,c            | a-b                  | 5,6,1   | -0.302                     | -0.114 | -0.571 | -0.089 | 0.103  | -0.425 | 0.046 | 0.149 | -0.078 | 0.365 | 0.480 |
| 127 | 3/4                                          | 2a,a+2b,c            |                      | 5,6,1   | -0.817                     | -0.627 | -0.892 | -0.359 | -0.117 | -0.518 | 0.054 | 0.158 | 0.162  | 0.754 | 0.812 |
| 128 | 4/4                                          | 2a,a+2b,c            |                      | 5,6,1   | -1.198                     | -0.954 | -1.068 | -0.517 | -0.145 | -0.323 | 0.299 | 0.396 | 0.602  | 1.325 | 1.360 |
| 129 | 0/4                                          | 2a,2b,c              |                      | 6,6,1   | 1.002                      | 1.185  | 0.754  | 0.803  | 0.916  | 0.655  | 0.574 | 0.633 | 0.472  | 0.366 | 0.351 |
| 130 | 1/4                                          | 2a,2b,c              |                      | 6,6,1   | 0.237                      | 0.434  | -0.009 | 0.266  | 0.445  | -0.005 | 0.223 | 0.309 | 0.026  | 0.222 | 0.316 |
| 131 | 2/4                                          | 2a,2b,c              | a                    | 6,6,1   | -0.347                     | -0.150 | -0.551 | -0.142 | 0.072  | -0.406 | 0.034 | 0.133 | -0.067 | 0.357 | 0.458 |
| 132 | 3/4                                          | 2a,2b,c              |                      | 6,6,1   | -0.839                     | -0.628 | -0.895 | -0.392 | -0.126 | -0.512 | 0.052 | 0.170 | 0.191  | 0.788 | 0.876 |
| 133 | 4/4                                          | 2a,2b,c              |                      | 6,6,1   | -1.207                     | -0.947 | -1.065 | -0.517 | -0.148 | -0.320 | 0.307 | 0.397 | 0.607  | 1.330 | 1.357 |
| 134 | 0/4                                          | a,2a+4b,c            |                      | 10,3,1  | 1.014                      | 1.183  | 0.741  | 0.803  | 0.912  | 0.652  | 0.566 | 0.635 | 0.463  | 0.345 | 0.340 |
| 135 | 1/4                                          | a,2a+4b,c            |                      | 10,3,1  | 0.330                      | 0.501  | 0.080  | 0.324  | 0.480  | 0.110  | 0.286 | 0.364 | 0.183  | 0.335 | 0.344 |
| 136 | 2/4                                          | a,2a+4b,c            | a+b                  | 10,3,1  | -0.239                     | -0.076 | -0.460 | -0.041 | 0.159  | -0.257 | 0.157 | 0.237 | .      | .     | .     |
| 137 | 3/4                                          | a,2a+4b,c            |                      | 10,3,1  | -0.797                     | -0.608 | -0.943 | -0.380 | -0.113 | -0.514 | 0.101 | 0.188 | .      | .     | .     |
| 138 | 4/4                                          | a,2a+4b,c            |                      | 10,3,1  | -1.200                     | -0.954 | -1.067 | -0.516 | -0.145 | -0.323 | 0.299 | 0.393 | 0.600  | 1.320 | 1.351 |
| 139 | 0/5                                          | -2a-3b,3a+2b,c       |                      | 6,6,1   | 1.005                      | 1.179  | 0.745  | 0.803  | 0.923  | 0.658  | 0.568 | 0.643 | 0.465  | 0.351 | 0.339 |
| 140 | 1/5                                          | -2a-3b,3a+2b,c       |                      | 6,6,1   | 0.409                      | 0.591  | 0.143  | 0.380  | 0.550  | 0.131  | 0.290 | 0.390 | 0.124  | 0.249 | 0.315 |
| 141 | 2/5                                          | -2a-3b,3a+2b,c       | a+2b                 | 6,6,1   | -0.084                     | 0.107  | -0.386 | 0.026  | 0.227  | -0.308 | 0.086 | 0.200 | -0.112 | 0.247 | 0.370 |
| 142 | 2/5                                          | -2a-3b,3a+2b,c       | b                    | 6,6,1   | -0.083                     | 0.082  | -0.330 | 0.061  | 0.256  | -0.224 | 0.140 | 0.235 | -0.007 | 0.333 | 0.407 |
| 143 | 3/5                                          | -2a-3b,3a+2b,c       | b,-a                 | 6,6,1   | -0.523                     | -0.340 | -0.744 | -0.214 | 0.014  | -0.496 | 0.053 | 0.160 | .      | 0.536 | 0.616 |
| 144 | 3/5                                          | -2a-3b,3a+2b,c       | a+2b,b               | 6,6,1   | -0.532                     | -0.364 | -0.688 | -0.205 | 0.000  | -0.478 | 0.028 | 0.116 | 0.009  | 0.500 | 0.539 |
| 145 | 4/5                                          | -2a-3b,3a+2b,c       |                      | 6,6,1   | -0.902                     | -0.719 | -0.941 | -0.395 | -0.128 | -0.500 | 0.095 | 0.188 | 0.227  | .     | 0.930 |
| 146 | 5/5                                          | -2a-3b,3a+2b,c       |                      | 6,6,1   | -1.201                     | -0.963 | -1.067 | -0.511 | -0.136 | -0.321 | 0.302 | 0.395 | 0.605  | 1.333 | 1.357 |
| 147 | 0/5                                          | -3a+2b,2a-3b,c       |                      | 10,10,1 | 1.014                      | 1.176  | 0.743  | 0.797  | 0.919  | 0.659  | 0.568 | 0.638 | 0.460  | 0.345 | 0.337 |
| 148 | 2/5                                          | -3a+2b,2a-3b,c       | 3a-3b                | 10,10,1 | 0.008                      | 0.163  | -0.226 | 0.118  | 0.310  | -0.079 | 0.232 | 0.291 | .      | 0.454 | 0.466 |
| 149 | 2/5                                          | -3a+2b,2a-3b,c       | -a+b                 | 10,10,1 | -0.081                     | 0.102  | -0.302 | 0.043  | 0.241  | -0.203 | 0.127 | 0.228 | 0.024  | 0.340 | 0.384 |
| 150 | 3/5                                          | -3a+2b,2a-3b,c       | -a+b,3a-3b           | 10,10,1 | -0.527                     | -0.345 | -0.728 | -0.240 | -0.003 | -0.473 | 0.051 | 0.143 | .      | 0.496 | 0.559 |
| 151 | 3/5                                          | -3a+2b,2a-3b,c       | -a+b,2a-2b           | 10,10,1 | -0.441                     | -0.277 | -0.619 | -0.161 | 0.073  | -0.315 | 0.161 | 0.227 | .      | .     | .     |
| 152 | 5/5                                          | -3a+2b,2a-3b,c       |                      | 10,10,1 | -1.197                     | -0.964 | -1.069 | -0.514 | -0.139 | -0.320 | 0.301 | 0.391 | 0.606  | 1.329 | 1.353 |
| 153 | 0/6                                          | -3a-b,-2b,c          |                      | 4,5,1   | 1.011                      | 1.190  | 0.744  | 0.797  | 0.898  | 0.659  | 0.556 | 0.640 | 0.457  | 0.352 | 0.333 |
| 154 | 2/6                                          | -3a-b,-2b,c          | -a+b                 | 4,5,1   | 0.052                      | 0.245  | -0.218 | 0.120  | 0.307  | -0.166 | 0.139 | 0.256 | -0.033 | 0.249 | 0.354 |
| 155 | 3/6                                          | -3a-b,-2b,c          | -a-b,-2a-b           | 4,5,1   | -0.322                     | -0.128 | -0.566 | -0.118 | 0.085  | -0.418 | 0.033 | 0.152 | -0.065 | 0.375 | 0.460 |
| 156 | 5/6                                          | -3a-b,-2b,c          |                      | 4,5,1   | -0.961                     | -0.759 | -0.975 | -0.442 | -0.151 | -0.475 | 0.117 | 0.232 | .      | .     | .     |

Table A.1 (cont.). Summary of supercell arrangements and adsorbate configurations used in formation energy calculations.

| ID# | Coverage<br>$N_{\text{ads}}/N_{\text{site}}$ | Supercell<br>Vectors | Adsorbate<br>Vectors   | k-Point  | $E_{\text{frm}}$ (eV/site) |        |        |        |        |        |       |       |        |       |       |
|-----|----------------------------------------------|----------------------|------------------------|----------|----------------------------|--------|--------|--------|--------|--------|-------|-------|--------|-------|-------|
|     |                                              |                      |                        |          | Ru                         | Os     | Co     | Rh     | Ir     | Ni     | Pd    | Pt    | Cu     | Ag    | Au    |
| 157 | 6/6                                          | -3a-b, -2b, c        |                        | 4, 5, 1  | -1.199                     | -0.955 | -1.071 | -0.530 | -0.150 | -0.316 | 0.298 | 0.400 | 0.608  | 1.336 | 1.358 |
| 158 | 0/6                                          | -b, 6a+3b, c         |                        | 10, 2, 1 | 1.013                      | 1.179  | 0.742  | 0.804  | 0.909  | 0.654  | 0.555 | 0.644 | 0.463  | 0.344 | 0.344 |
| 159 | 3/6                                          | -b, 6a+3b, c         | 2a+b, a+b              | 10, 2, 1 | -0.201                     | -0.037 | -0.405 | -0.020 | 0.194  | -0.165 | 0.208 | 0.270 | .      | .     | .     |
| 160 | 6/6                                          | -b, 6a+3b, c         |                        | 10, 2, 1 | -1.200                     | -0.958 | -1.069 | -0.531 | -0.154 | -0.323 | 0.299 | 0.400 | 0.605  | 1.331 | 1.353 |
| 161 | 0/6                                          | a-b, 3a+3b, c        |                        | 6, 3, 1  | 1.004                      | 1.161  | 0.745  | 0.804  | 0.913  | 0.651  | 0.565 | 0.638 | 0.466  | 0.348 | 0.338 |
| 162 | 1/6                                          | a-b, 3a+3b, c        |                        | 6, 3, 1  | 0.518                      | 0.686  | 0.241  | 0.452  | 0.597  | 0.213  | 0.336 | 0.423 | 0.181  | 0.260 | 0.318 |
| 163 | 2/6                                          | a-b, 3a+3b, c        | a+b                    | 6, 3, 1  | 0.060                      | 0.241  | -0.216 | 0.135  | 0.313  | -0.167 | 0.150 | 0.247 | -0.038 | 0.237 | 0.341 |
| 164 | 3/6                                          | a-b, 3a+3b, c        | a+b, -b                | 6, 3, 1  | -0.309                     | -0.129 | -0.558 | -0.090 | 0.090  | -0.413 | 0.054 | 0.148 | -0.066 | 0.369 | 0.453 |
| 165 | 4/6                                          | a-b, 3a+3b, c        | a+b, -b, a             | 6, 3, 1  | -0.640                     | -0.457 | -0.836 | -0.279 | -0.050 | -0.515 | 0.069 | 0.166 | .      | .     | 0.693 |
| 166 | 5/6                                          | a-b, 3a+3b, c        |                        | 6, 3, 1  | -0.957                     | -0.759 | -0.975 | -0.418 | -0.145 | -0.478 | 0.125 | 0.221 | .      | .     | 0.999 |
| 167 | 6/6                                          | a-b, 3a+3b, c        |                        | 6, 3, 1  | -1.205                     | -0.956 | -1.075 | -0.516 | -0.145 | -0.321 | 0.300 | 0.397 | 0.605  | 1.326 | 1.359 |
| 168 | 0/7                                          | -3a-b, a-2b, c       |                        | 4, 4, 1  | 1.030                      | 1.191  | 0.747  | 0.798  | 0.914  | 0.656  | 0.581 | 0.636 | 0.471  | 0.350 | 0.342 |
| 169 | 4/7                                          | -3a-b, a-2b, c       | 2a+b, a+b, b           | 4, 4, 1  | -0.471                     | -0.275 | -0.702 | -0.195 | 0.032  | -0.485 | 0.049 | 0.147 | .      | .     | 0.542 |
| 170 | 6/7                                          | -3a-b, a-2b, c       |                        | 4, 4, 1  | -0.996                     | -0.785 | -0.992 | -0.444 | -0.139 | -0.464 | 0.149 | 0.236 | 0.318  | .     | .     |
| 171 | 7/7                                          | -3a-b, a-2b, c       |                        | 4, 4, 1  | -1.195                     | -0.944 | -1.069 | -0.516 | -0.132 | -0.317 | 0.306 | 0.398 | 0.605  | 1.331 | 1.348 |
| 172 | 0/7                                          | -a+3b, -a-4b, c      |                        | 6, 6, 1  | 1.008                      | 1.175  | 0.742  | 0.799  | 0.918  | 0.659  | 0.568 | 0.636 | 0.463  | 0.347 | 0.340 |
| 173 | 1/7                                          | -a+3b, -a-4b, c      |                        | 6, 6, 1  | 0.585                      | 0.759  | 0.310  | 0.496  | 0.646  | 0.281  | 0.372 | 0.452 | 0.217  | 0.271 | 0.313 |
| 174 | 2/7                                          | -a+3b, -a-4b, c      | a-b                    | 6, 6, 1  | 0.188                      | 0.379  | -0.104 | 0.213  | 0.393  | -0.083 | 0.193 | 0.294 | -0.009 | 0.218 | 0.325 |
| 175 | 3/7                                          | -a+3b, -a-4b, c      | a-2b, a-b              | 6, 6, 1  | -0.169                     | 0.028  | -0.440 | -0.028 | 0.174  | -0.340 | 0.072 | 0.176 | -0.107 | 0.273 | 0.383 |
| 176 | 4/7                                          | -a+3b, -a-4b, c      | a-2b, a-b, a           | 6, 6, 1  | -0.480                     | -0.304 | -0.650 | -0.188 | 0.017  | -0.453 | 0.031 | 0.118 | -0.015 | 0.455 | 0.503 |
| 177 | 3/7                                          | -a+3b, -a-4b, c      | a-b, a+b               | 6, 6, 1  | -0.141                     | 0.046  | -0.426 | 0.003  | 0.192  | -0.327 | 0.088 | 0.185 | -0.082 | 0.296 | 0.411 |
| 178 | 4/7                                          | -a+3b, -a-4b, c      | a-2b, a, a+b           | 6, 6, 1  | -0.431                     | -0.267 | -0.626 | -0.153 | 0.069  | -0.374 | 0.118 | 0.200 | .      | .     | 0.613 |
| 179 | 4/7                                          | -a+3b, -a-4b, c      | a-2b, a, -2b           | 6, 6, 1  | -0.465                     | -0.289 | -0.672 | -0.168 | 0.019  | -0.477 | 0.039 | 0.122 | -0.033 | 0.458 | 0.530 |
| 180 | 5/7                                          | -a+3b, -a-4b, c      | a-2b, a-b, a, -2b      | 6, 6, 1  | -0.756                     | -0.581 | -0.847 | -0.320 | -0.103 | -0.521 | 0.044 | 0.132 | 0.119  | 0.683 | 0.724 |
| 181 | 6/7                                          | -a+3b, -a-4b, c      |                        | 6, 6, 1  | -0.995                     | -0.796 | -0.985 | -0.438 | -0.147 | -0.452 | 0.156 | 0.243 | .      | .     | .     |
| 182 | 7/7                                          | -a+3b, -a-4b, c      |                        | 6, 6, 1  | -1.202                     | -0.962 | -1.062 | -0.509 | -0.134 | -0.311 | 0.311 | 0.400 | 0.612  | 1.333 | 1.351 |
| 183 | 0/8                                          | -3a+b, a-3b, c       |                        | 5, 5, 1  | 1.013                      | 1.185  | 0.746  | 0.801  | 0.912  | 0.652  | 0.572 | 0.631 | 0.471  | 0.361 | 0.347 |
| 184 | 2/8                                          | -3a+b, a-3b, c       | b                      | 5, 5, 1  | 0.297                      | 0.476  | 0.021  | 0.291  | 0.459  | 0.033  | 0.248 | 0.334 | 0.085  | 0.265 | 0.339 |
| 185 | 4/8                                          | -3a+b, a-3b, c       | 3a-2b, 2a-b, a-b       | 5, 5, 1  | -0.326                     | -0.132 | -0.561 | -0.122 | 0.084  | -0.416 | 0.038 | 0.138 | -0.072 | 0.359 | 0.447 |
| 186 | 8/8                                          | -3a+b, a-3b, c       |                        | 5, 5, 1  | -1.198                     | -0.962 | -1.065 | -0.517 | -0.146 | -0.319 | 0.305 | 0.397 | 0.605  | 1.327 | 1.353 |
| 187 | 0/8                                          | -3a-2b, a-2b, c      |                        | 4, 4, 1  | 1.013                      | 1.199  | 0.746  | 0.792  | 0.902  | 0.657  | 0.573 | 0.642 | 0.463  | 0.352 | 0.342 |
| 188 | 4/8                                          | -3a-2b, a-2b, c      | 2a+3b, a+3b, a+2b      | 4, 4, 1  | -0.306                     | -0.110 | -0.605 | -0.115 | 0.091  | -0.449 | 0.059 | 0.169 | .      | .     | 0.479 |
| 189 | 8/8                                          | -3a-2b, a-2b, c      |                        | 4, 4, 1  | -1.200                     | -0.954 | -1.066 | -0.520 | -0.141 | -0.319 | 0.302 | 0.397 | 0.603  | 1.330 | 1.354 |
| 190 | 0/8                                          | a-b, 4a+4b, c        |                        | 6, 3, 1  | 1.008                      | 1.179  | 0.745  | 0.806  | 0.914  | 0.651  | 0.565 | 0.638 | 0.465  | 0.349 | 0.338 |
| 191 | 1/8                                          | a-b, 4a+4b, c        |                        | 6, 3, 1  | 0.638                      | 0.812  | 0.367  | 0.538  | 0.674  | 0.323  | 0.390 | 0.473 | 0.251  | 0.280 | 0.317 |
| 192 | 4/8                                          | a-b, 4a+4b, c        | a+b, a+2b, 2a+3b       | 6, 3, 1  | -0.299                     | -0.120 | -0.544 | -0.085 | 0.101  | -0.404 | 0.057 | 0.149 | -0.070 | 0.361 | 0.458 |
| 193 | 5/8                                          | a-b, 4a+4b, c        | a+b, a+2b, 2a+3b, -a-b | 6, 3, 1  | -0.576                     | -0.409 | -0.724 | -0.226 | -0.038 | -0.499 | 0.024 | 0.107 | 0.016  | 0.517 | 0.552 |
| 194 | 7/8                                          | a-b, 4a+4b, c        |                        | 6, 3, 1  | -1.020                     | -0.816 | -1.000 | -0.450 | -0.153 | -0.444 | 0.165 | 0.260 | .      | .     | .     |
| 195 | 8/8                                          | a-b, 4a+4b, c        |                        | 6, 3, 1  | -1.198                     | -0.953 | -1.067 | -0.517 | -0.143 | -0.320 | 0.300 | 0.397 | 0.604  | 1.328 | 1.358 |

Supercell geometries and coverages with more than one possible adsorbate arrangement indicate the relationships between initial and subsequent adsorbates (e.g., for configuration 143: the vector between the 1<sup>st</sup> and 2<sup>nd</sup> adsorbate is b; the vector between the 1<sup>st</sup> and 3<sup>rd</sup> adsorbate is -a). All k-point meshes are  $\Gamma$ -centered.

$$a = (1, 0, 0) \quad b = \left(-\frac{1}{2}, \frac{\sqrt{3}}{2}, 0\right) \quad c = \left(0, 0, \frac{20\sqrt{6}}{3}\right)$$
